# The Spatial Mixing of Genomes in Secondary Contact Zones

Alisa Sedghifar<sup>\*</sup>, Yaniv Brandvain<sup>§</sup>, Peter Ralph<sup>†</sup>, and Graham Coop<sup>\*</sup>

<sup>\*</sup>Department of Evolution and Ecology & Center for Population Biology, University of California, Davis, Davis, California, 95616

<sup>§</sup>Department of Plant Biology, University of Minnesota, St. Paul, Minnesota, 55108

<sup>†</sup>Department of Molecular and Computational Biology, University of Southern California, Los Angeles, California, 90089

## Abstract

Recent genomic studies have highlighted the important role of admixture in shaping genome-wide patterns of diversity. Past admixture leaves a population genomic signature of linkage disequilibrium (LD), reflecting the mixing of parental chromosomes by segregation and recombination. The extent of this LD can be used to infer the timing of admixture. However, the results of inference can depend strongly on the assumed demographic model. Here, we introduce a theoretical framework for modeling patterns of LD in a geographic contact zone where two differentiated populations are diffusing back together. We derive expressions for the expected LD and admixture tract lengths across geographic space as a function of the age of the contact zone and the dispersal distance of individuals. We develop an approach to infer age of contact zones using population genomic data from multiple spatially sampled populations by fitting our model to the decay of LD with recombination distance. We use our approach to explore the fit of a geographic contact zone model to three human population genomic datasets from populations along the Indonesian archipelago, populations in Central Asia and populations in India.

# 1 Introduction

Populations frequently undergo periods of relative isolation that are followed by secondary contact. During isolation, the evolutionary processes of genetic drift, mutation, and selection act to differentiate populations at many markers throughout the genome. When these populations come back into contact, the restoration of gene flow generates admixed populations, which start as an assemblage of differentiated parental genomes that are broken up every generation by segregation and recombination between chromosomes.

Under this process, linked alleles of the same ancestry will tend to be co-inherited until separated by recombination. Because the parental populations are differentiated with respect to each other, this co-inheritance leads to a nonrandom association of alleles, referred to as linkage disequilibrium (LD). This admixture-induced LD (or admixture-LD) initially extends over a much larger genomic scale than LD does in either parental population and is a signature of relatively recent admixture (CHAKRABORTY and WEISS 1988; CAVALLI-SFORZA and BODMER 1971). One can also think of this signature as the persistence of parental haplotypes in admixed populations which, rather than being measured directly, is measured as the extent of co-occurrence along a chromosome of alleles that are diagnostic of parental origin. Recombination acts every generation to gradually break apart long tracts of ancestry into smaller tracts, and so the association between nearby alleles lasts many generations. The physical scale over which admixture-LD breaks down is determined by the timescale over which parental populations have been interbreeding; the conservation of many ancestral haplotypes over large physical distances would imply very recent admixture, whereas a longer history of admixture produces many smaller parental tracts.

Data from many (potentially weakly) differentiated markers allows for the identification and quantification of admixture in individuals (e.g. PRITCHARD *et al.* 2000) and the inference of the ancestral origin of a given chromosomal region (e.g. FALUSH *et al.* 2003; PRICE *et al.* 2009; HELLENTAL *et al.* 2014). The continued mixing of differentiated genotypes, as described above, produces predictable population genomic patterns that change through time, and these signals can be used to not only detect past admixture in extant population, but also to learn about the timing and history of these admixture events (e.g. HELLENTAL *et al.* 2014; LOH *et al.* 2013; HARRIS and NIELSEN 2013). Such inferences have been used to reconstruct historical population movements, highlighting the importance of admixture in shaping patterns of diversity in human populations (HELLENTAL *et al.* 2014; REICH

37 *et al.* 2009; PATTERSON *et al.* 2012; LOH *et al.* 2013; MOORJANI *et al.* 2013). These  
 38 studies have utilized powerful methods that first identify stretches of chromosome  
 39 inherited from a particular parental population (admixture tracts GRAVEL 2012;  
 40 HELLENTHAL *et al.* 2014), or measure the covariance, over spatial scales, of vari-  
 41 ants that are diagnostic of parental populations (admixture-LD PATTERSON *et al.*  
 42 2012; LOH *et al.* 2013), and then infer the genetic scale over which this measured  
 43 coancestry decays. Commonly this is done by assuming a model of admixture in  
 44 which one isolated population is formed by a single admixture event in time, with  
 45 subsequent random mating. Under this simple model, the distribution of admix-  
 46 ture tract lengths and the decay of admixture-LD with respect to genetic distance  
 47 is approximately exponential, with the rate parameter corresponding to the time in  
 48 generations since admixture. However, violations of the assumptions of the single-  
 49 pulse model can result in substantial departure between expected and observed rates  
 50 of decay of coancestry with respect to time.

51 Models incorporating multiple admixture times, or sustained, migration (POOL  
 52 and NIELSEN 2009; GRAVEL 2012; LIANG and NIELSEN 2014; HELLENTHAL *et al.*  
 53 2014) have been built to address more complex admixture scenarios in single pop-  
 54 ulations. However, these do not incorporate the fact that admixture often occurs  
 55 in a geographic context – beginning at a given point in time, then spreading across  
 56 space. Most current models treat each admixed population as an independent event,  
 57 not accounting for this spatial context, even when admixture in spatially distributed  
 58 populations are potentially attributable to a single historical event.

59 In this paper we build an alternative model of diffusion of ancestry across geog-  
 60 raphy in time. Specifically, we consider a scenario in which two populations spread  
 61 back into contact, generating a gradient of admixture across space with the greatest  
 62 degree of admixture at the point of initial contact. We refer to this mixture across  
 63 space, where migration is sustained through both time and space, as a contact zone.  
 64 This geographic mixing leads to departures from a simple model of exponential decay  
 65 of admixture-LD as there is exchange of migrants between neighboring populations  
 66 with different admixture proportions. We describe the expected ancestry-LD in con-  
 67 tact zones accounting for migration in continuous space. This model provides a  
 68 framework to simultaneously examine admixture patterns over a set of geograph-  
 69 ically distributed populations, and a potential geographic null model for studying  
 70 historical movements of populations. Inference under this model provides a means  
 71 to estimate both the time at which populations spread back into contact, as well as  
 72 some measures of dispersal. We analyze several potential human contact zones under  
 73 our model and show that simpler ‘point’ models of admixture can infer unreasonably

74 recent admixture dates.

## 75 2 Methods

### 76 2.1 Outline of neutral model

77 Consider two differentiated populations along a transect in space, formerly sepa-  
 78 rated by a barrier that completely prevented migration (at position  $x = 0$ ) that was  
 79 removed  $\tau$  generations ago (Fig. 1). We imagine the barrier as a physical obstruc-  
 80 tion to migration; however, in practice the two previously isolated populations could  
 81 come into contact through a variety of means. We use a continuous-space limit of  
 82 randomly mating (Wright-Fisher) populations on a line, made formal in e.g. SHIGA  
 83 (1980) that can be described informally as follows:

84 Since time  $\tau$ , individuals have moved without restrictions following a Gaussian  
 85 dispersal kernel, in such a way that the distribution of displacements between an  
 86 ancestor and descendant separated by  $t$  generations is Gaussian with mean zero and  
 87 variance  $\sigma^2 t$ . This forms a gradient of admixed populations across space, whose  
 88 degree of admixture depends on the time that has passed and the distance to the  
 89 point of initial contact. Over time, genotypes of different ancestries diffuse across  
 90 the entire range, and recombination breaks down tracts of continuous ancestry. We  
 91 aim to describe this diffusion of ancestry throughout time and space.

92 To determine the typical degree of admixture at a location, we follow the lineage  
 93 of a sampled individual back through time, tracing the spatial location of the ancestor  
 94 of today's sample back to the initiation of secondary contact. The ancestral type of  
 95 today's sample is determined by the geographic position of its ancestor  $\tau$  generations  
 96 ago: we say that a sampled individual whose lineage falls to the left of the barrier  
 97 (i.e. some point where  $x < 0$ ) is of ancestry  $A$ , and is otherwise of ancestry  $B$ . This  
 98 represents the alleles belonging to ancestral population  $A$  or  $B$  before the initiation  
 99 of secondary contact. We treat time and space as continuous variables, and the  
 100 time-reversible properties of Brownian motion allow us to model the movement of  
 101 lineages as a continuous Brownian process.

## 102 2.2 Behavior of a single locus

103 We start by describing the properties of a single lineage,  $\mathcal{A}$ , that is sampled at  
 104 position  $\ell$  relative to the center of the contact zone (at  $x = 0$ ),  $\tau$  generations after  
 105 initial contact. Since we assume the movement of the lineage to be Brownian, the  
 106 probability that  $\mathcal{A}$  is of ancestry  $B$  is equal to the probability that the Brownian  
 107 motion begun at  $x$  is to the right of zero after  $\tau$  generations, i.e.

$$\mathbb{E}[\mathbf{1}_B(\mathcal{A})] = \int_{-\frac{\ell}{\sigma\sqrt{\tau}}}^{\infty} \frac{1}{\sqrt{2\pi}} \exp\left(-\frac{x^2}{2}\right) dx = \Phi(\ell/\sigma\sqrt{\tau}). \quad (1)$$

Here  $\mathbf{1}_B(\mathcal{A})$  is the indicator function:

$$\mathbf{1}_B(\mathcal{A}) = \begin{cases} 1 & \mathcal{A} \text{ has ancestry } B \\ 0 & \mathcal{A} \text{ has ancestry } A \end{cases}$$

108 Eq. 1, follows from the assumption that the displacement between parents and off-  
 109 spring is Gaussian with variance  $\sigma^2$ , allowing us to describe the movement of the  
 110 lineage after  $\tau$  generations by the Brownian process  $B_\tau$ . The probability then that  
 111 an individual sampled at geographic position  $\ell$  inherits at a given locus from ances-  
 112 tral population  $B$  is the probability that  $x_\tau > 0$  where  $x_\tau \sim \mathcal{N}(\ell, \tau\sigma^2)$ . This is also  
 113 the expected frequency of ancestry  $B$  at position  $\ell$ ,  $\tau$  generations after contact, and  
 114 provides an expectation of the cline in ancestry proportion. Although this derivation  
 115 assumes continuous time, the expression also holds in the case of non-overlapping  
 116 generations since, if dispersal is Gaussian, the position of an allele at time  $\tau$  is simi-  
 117 larly described by a normal distribution.

118 Under this model, we expect the zone of significant admixture to extend over  
 119 distance roughly  $2\sqrt{\tau}\sigma$  in either direction so, to fit our model using the inference  
 120 framework we describe below, we will need samples on this spatial scale.

## 121 2.3 Ancestry LD between linked loci

122 In our model, all chromosomes begin as unbroken tracts of ancestry prior to initial  
 123 contact. As time progresses, recombination between haplotypes of different ancestry  
 124 breaks down these associations. To model this effect, we consider two linked loci  
 125 separated by a recombination fraction  $r$ , on a single chromosome sampled at geo-  
 126 graphic position  $\ell$  (see Fig. 1 and legend), and denote the ancestral lineages at these

127 to loci as  $\mathcal{A}_1$  and  $\mathcal{A}_2$ , respectively. The recombination fraction between the loci is  
 128 the per generation probability of observing a recombinant haplotype as the product  
 129 of meiosis. For close pairs of markers it may suffice to use the genetic distance  $d$  in  
 130 Morgans that separates markers, but for more distant markers we use the probability  
 131 of an *observed* recombination event, which is the probability of an odd number of  
 132 recombination events between focal loci, accounting for interference when possible.

133 We measure ancestry-LD as the covariance in ancestry between the alleles at the  
 134 two loci

$$\text{Cov}(\mathbf{1}_B(\mathcal{A}_1), \mathbf{1}_B(\mathcal{A}_2)) = \mathbb{E}[\mathbf{1}_B(\mathcal{A}_1)\mathbf{1}_B(\mathcal{A}_2)] - \mathbb{E}[\mathbf{1}_B(\mathcal{A}_1)]\mathbb{E}[\mathbf{1}_B(\mathcal{A}_2)] \quad (2)$$

135 Since  $\mathcal{A}_1$  and  $\mathcal{A}_2$  are exchangeable, the second term is simply  $\mathbb{E}[\mathbf{1}_B(\mathcal{A}_1)]^2$ , which by  
 136 Eq. 1 is  $\Phi\left(\frac{\ell}{\sigma\sqrt{\tau}}\right)^2$ .

137 The first term of Eq. 2 is the probability that both  $\mathcal{A}_1$  and  $\mathcal{A}_2$  are of ancestry B,  
 138 which we can compute by considering the Brownian movement of the two lineages.  
 139 At the time of sampling, and until the first recombination event between the two loci,  
 140 the two lineages follow an identical path back through time. We assume that after  
 141 the first recombination event the two lineages never coalesce back onto the same  
 142 chromosome and therefore pursue independent Brownian paths for the remaining  
 143 time back to  $\tau$  (Fig. 1). This assumption ignores drift since secondary contact.

144 This assumption of no drift will be good if  $\sqrt{\tau}$  is much smaller than Wright's  
 145 neighborhood size  $N_\sigma$ , i.e. the number of individuals within a region of width  $\sigma$   
 146 (WRIGHT 1943). This is because in one dimension, assuming Gaussian dispersal,  
 147 the number of generations that two randomly moving lineages that start in the same  
 148 place spend within distance  $\sigma$  of each other across  $\tau$  generations is of order  $\sqrt{\tau}$ ; the  
 149 chance that they coalesce each time they are is proportional to  $1/N_\sigma$ , and so the  
 150 chance of coalescence is negligible if  $\sqrt{\tau}/N_\sigma \ll 1$ . (For more discussion of scaling see  
 151 e.g. BARTON *et al.* (2002).)

152 To find an expression for this covariance, observe that the random time  $T$  since  
 153 the first recombination event between the two loci is exponentially distributed with  
 154 rate parameter  $r$ . Given that the most recent recombination along this lineage oc-  
 155 curred  $T$  generations ago, with  $T < \tau$ , the joint spatial positions  $(X_1, X_2)$  of the two  
 156 lineages  $(\mathcal{A}_1, \mathcal{A}_2)$  at time  $\tau$  generations ago is bivariate normally distributed with  
 157 covariance  $T\sigma^2$ , variance  $\tau\sigma^2$  and mean  $(\ell, \ell)$ , the probability density of which we  
 158 denote  $f_t(x_1, x_2)$ .

159 The probability that both lineages are to the right of zero  $\tau$  generations ago, and  
160 hence are both of ancestry  $B$ , is therefore given by:

$$\mathbb{E}[\mathbf{1}_B(\mathcal{A}_1)\mathbf{1}_B(\mathcal{A}_2)] = e^{-r\tau}\Phi\left(\frac{\ell}{\sigma\sqrt{\tau}}\right) + \int_0^\tau re^{-rt} \int_\ell^\infty \int_\ell^\infty f_t(x_1, x_2) dx_1 dx_2 dt \quad (3)$$

161 The first term of Eq. 3 corresponds to the probability that there is no recombination  
162 multiplied by the probability that the path of our single ancestral lineage is on the  
163 right side of the barrier when the barrier was removed. The second term integrates  
164 the probability that two lineages that recombined  $t$  generations ago are both to the  
165 right of of the barrier, i.e. the bivariate normal density integrated over the quadrant  
166  $x_1 > 0$  and  $x_2 > 0$ , over all possible times of first recombination. Rescaling  $t$  so that  
167  $u = t/\tau$ , equations 2 and 3 come together to give:

$$\begin{aligned} \text{Cov}[\mathbf{1}_B(\mathcal{A}_1), \mathbf{1}_B(\mathcal{A}_2)] &= \int_0^1 e^{-ru\tau} \frac{1}{2\pi\sqrt{1-u^2}} \exp\left(-\frac{\ell^2}{\tau\sigma^2(1+u)}\right) du \\ &=: D(r, \ell, \tau, \sigma) \end{aligned} \quad (4)$$

168 To obtain this expression, we integrate by parts, make use of the identity in  
169 Eq. A3, and rescale  $(0, \tau)$  onto  $(0, 1)$  (see Appendix A for more detail). We denote  
170 this covariance as a function  $D(r, \ell, \tau, \sigma)$ , which expresses the expected covariance  
171 in ancestries of two loci in a randomly sampled individual from a given geographic  
172 location ( $\ell$ ) as a function of recombination fraction ( $r$ ) between the loci, time since  
173 admixture ( $\tau$ ) and rate of dispersal ( $\sigma$ ). In Appendix B we also develop analogous  
174 results for arbitrary migration schemes in discretized space, for both continuous and  
175 discrete time.

## 176 2.4 Admixture block lengths.

177 An extension to the above approach for describing admixture-LD between two loci is  
178 to consider how ancestry along the chromosome is partitioned into unbroken genomic  
179 tracts of ancestry drawn from one parental population. This is a natural way to  
180 think about coancestry in admixed populations, and the genome-wide distribution  
181 of ancestry tract length can contain information about admixture.



We again examine a chromosome drawn at random at geographic position  $\ell$ , this time considering the probability that between physical positions  $P$  and  $Q$ , separated by genetic distance  $d$ , the chromosome is only of ancestry  $B$ . As above, we assume that after linkage is broken by recombination, the products of recombination move independently with respect to each other. This again assumes that  $\tau$  is small relative to the timescale of coalescence. Further, it ignores the correlation structure imposed by the pedigree (LIANG and NIELSEN 2014; WAKELEY *et al.* 2012), the impact of which we return to in the discussion.

We note that our measure of recombination rate  $d$  will differ from the earlier definition of recombination fraction as we will be tracking all recombination events between  $P$  and  $Q$ . We now assume that recombination events occur as a Poisson process with rate  $d$ , which reflects genetic distance on the genetic map between our two endpoint loci, and assume no chromatid interference.

If there have been  $K$  recombination events that occurred along the tract of chromosome over the last  $\tau$  generations, then this region has  $K + 1$  genetic ancestors from time  $\tau$  that have spatial locations  $\mathbf{X} = (X_1, \dots, X_{K+1})$ . As we neglect coalescence, we assume these ancestors are distinct. The segment contains only ancestry from population  $B$  if all  $X_i > 0$  (i.e. all  $K + 1$  ancestors are to the right of 0 at time  $\tau$ , see Fig. 1 for an example of  $K=2$ ). We denote the probability of our segment containing only ancestry from population  $B$  as:

$$U_d(\tau, \ell) = \mathbb{E} \left[ \prod_i^k \mathbf{1}_B(X_i) \right] \quad (5)$$

This is the expected value averaging over both the number and timing of recombination events, and the locations of the ancestral lineages at time  $\tau$  ago (denoted  $\mathbf{X}$ ). We now outline one approach to obtain an expression for  $U_d(\tau, \ell)$ , and give a complementary approach in Appendix D.

#### 2.4.1 Obtaining block length distributions by summing over the number of recombination events.

Since we assume no coalescence, the branching order of the ancestral lineages via recombination specifies a labeled tree structure,  $\mathbf{S}$ , with  $K + 1$  tips and a vector of splitting times  $\mathbf{T} = (T_1, \dots, T_K)$  (where these times satisfy the constraints imposed



by the tree topology). Since, looking backwards in time, each lineage moves as an independent Brownian motion once it has split from the others, the  $(K+1)$ -length vector  $\mathbf{X}$  of geographic positions at time  $\tau$  is distributed as a  $(K+1)$ -dimensional multivariate normal with mean  $(\ell, \dots, \ell)$  and variance-covariance matrix  $\Sigma$ . The entries of  $\Sigma$  reflect the shared path of tips  $i$  and  $j$ , so that  $\Sigma_{i,j} = \sigma t_{i,j}$ , where  $t_{i,j}$  is the time of the recombination that separates tip  $i$  from tip  $j$ , and the diagonal entries  $\Sigma_{i,i} = \sigma^2 \tau$ . Conditioning on  $K = k$  recombinations and the matrix  $\Sigma$ , the probability that all  $k+1$  tips are of ancestry  $B$  is given by the integral of the  $k+1$ -dimensional normal density over the space for which all  $X_i > 0$ :

$$U(\tau, \ell | \Sigma) = \int_{\ell}^{\infty} \dots \int_{\ell}^{\infty} \frac{\exp\left(-\frac{1}{2} \mathbf{x}^T \Sigma^{-1} \mathbf{x}\right)}{\sqrt{(2\pi)^k |\Sigma|}} dx_1 \dots dx_{k+1}. \quad (6)$$

The integrand is the density for the multivariate normal which is determined by the timing and ordering along the chromosome of recombination events.

This needs to be averaged over possible trees; to do this, we sum over possible tree topologies, and for each tree topology integrate over possible split times ( $T_i \in [0, \tau]$ ). For a given tree topology  $\mathcal{T}$ , the term we need is the following (also rescaling spatial and temporal variables so that  $\Sigma' = \Sigma/(\sigma^2 \tau)$  and  $T'_i \in (0, 1)$ ):

$$U(\tau, \ell | \mathcal{T}) = \int_{\mathbf{t}'} U\left(1, \frac{\ell}{\sigma \sqrt{\tau}} \middle| \Sigma'\right) v(t'_1) dt'_1 \dots v(t'_{k+1}) dt'_{k+1} \quad (7)$$

The set of possible times,  $\mathbf{t}'$ , over which we integrate depends on the tree topology, and correspondingly, each topology has a weight, or probability conditioning on  $k$  recombinations that is given by  $\prod_{i=1}^{k+1} v(t_i)$ . (See Appendix C for a further description of  $\mathbf{t}'$  and  $v(\mathbf{t}')$ .)

Finally, we sum across  $k$  and  $\mathcal{T}_i^k$  in the set  $\mathcal{T}^k$  of all topologies given  $k$  recombination events.

$$U_d(\tau, \ell) = \sum_{k=0}^{\infty} \frac{(d\tau)^k e^{-d\tau}}{k!} \sum_{\mathcal{T}_i^k \in \mathcal{T}^k} \Pr(\mathcal{T}_i^k) U_r(\tau, \ell | \mathcal{T}_i^k). \quad (8)$$

Where  $\Pr(\mathcal{T}_i^k)$  is the probability of the  $i^{th}$  unlabeled topology given that there are  $k+1$  tips (we describe the calculation of  $\Pr(\mathcal{T}_i^k)$  in the Appendix C.) We note that Eq. 8 is a Wild sum expansion for  $U_d(\tau, \ell)$  (ETHERIDGE 2000). We outline an approach using differential equations to obtain an equivalent expression in the Appendix D.

237 In practice, we approximate this sum by conditioning on  $k^*$  or fewer recombina-  
238 tion events in  $\tau$  generations:

$$U_d^{k^*}(\tau, \ell) = \frac{1}{\Pr(k \leq k^* | d\tau)} \sum_{k=0}^{k^*} \frac{(d\tau)^k e^{-d\tau}}{k!} \sum_{\mathcal{T}_i^k \in \mathcal{T}^k} \Pr(\mathcal{T}_i^k) U_r(\tau, \ell | \mathcal{T}_i^k). \quad (9)$$

239 Fig. 2 shows the convergence as  $k^*$  is increased, to the distribution of tract lengths  
240 obtained by simulating *under the model* (see below for description for simulations  
241 under the model). Summing over the large number of topologies for large  $k^*$  is  
242 computationally expensive, but terms in the sum can be reused over some parameter  
243 values.

## 244 2.5 Simulations

245 We developed two classes of simulations to (1) evaluate the accuracy of our analytic  
246 results, and (2) to explore the consequences of realistic violations of our model that  
247 likely occur under the specified biological process. For the first class of simulations,  
248 **simulations under the model**, we consider chromosomes moving in continuous  
249 space and time, with recombination modeled as a Poisson process through contin-  
250 uous time and independent movement of all products of recombination. This is an  
251 explicit simulation of the model described above. We simulated 10000 chromosomes  
252 *under the model*.  
253

254 In the second class of simulations, **simulations under the process**, we follow a  
255 finite number of chromosomes migrating across discrete demes with non-overlapping  
256 generations forward in time. In these simulations we maintain the complete recom-  
257 bination history of a chromosome. As these features allow genetic drift, enforce a  
258 pedigree structure onto local ancestry, and occur in discrete time and space, our sim-  
259 ulations under the process present a biologically realistic challenge to many of our  
260 major modeling assumptions. We consider 200,000 diploids (400,000 chromosomes)  
261 evenly spread across 20 demes. Demes are connected through nearest-neighbor mi-  
262 gration with a per-generation, per individual probability  $m$  of migration (this migra-  
263 tion rate is reduced to  $m/2$  on demes at the edges of one-dimensional space). We  
264 sample the number of recombination events from a Poisson distribution with mean  
265 of one, corresponding to a 1 Morgan chromosome, and recombination events are  
266 uniformly placed along a chromosome (i.e. no recombinational interference). Every

generation, migration, random mating, and recombination take place, and we follow the positions of all tracts of ancestry. After  $\tau$  generations, we can sample chromosomes where the ancestor from the initial population of each locus is known. We then assign ancestry along each individual's chromosome based on whether ancestors originated in population 1–10 (ancestry B) or in populations 11–20 (ancestry A).

## 2.6 Inference of parameters in human admixture data

While the distribution of continuous-ancestry tracts necessarily contains more information than LD alone, there are limits to the precision of the measurement of tract length over short recombination distances (which would reflect old events). This, combined with the relative ease of obtaining LD measurements from genomic data, motivates our use of LD in our analysis of human admixture contact zones. A variety of methods, including ALDER (LOH *et al.* 2013) and Globetrotter (HELLENTHAL *et al.* 2014) estimate some measure of ancestry-LD. We use the weighted LD curves generated by ALDER, which estimates a quantity analogous to the covariance in ancestry by computing the statistic:

$$a(d) = \frac{1}{|S(d)|} \sum_{(M,N) \in S(d)} \widehat{\text{Cov}}(M, N) (p_A(M) - p_B(M))(p_A(N) - p_B(N)) \quad (10)$$

for a set of pairs of autosomal loci,  $S(d)$ , that are a genetic distance  $d$  apart.

Here,  $(M, N)$  is a locus pair,  $p_A(\cdot)$  and  $p_B(\cdot)$  are sample allele frequencies in the parental populations  $A$  and  $B$ , and  $\widehat{\text{Cov}}(M, N)$  is the sample covariance between alleles at the two loci within the target population. If  $r$  is large enough that background LD in the ancestral populations can be ignored, and that the allele frequencies in the parental populations are known, then  $\mathbb{E}[a(r)] = 2\alpha(1 - \alpha)F_2(A; B)^2 \text{Cov}(\mathbf{1}_B(\mathcal{A}_1), \mathbf{1}_B(\mathcal{A}_2)|r)$ , where  $\text{Cov}(\mathbf{1}_B(\mathcal{A}_1), \mathbf{1}_B(\mathcal{A}_2)|r)$  is the expected covariance in ancestry between pairs of loci a recombination fraction  $r$  apart,  $\alpha$  is the ancestry proportion of population  $A$  in the admixed population, and the constant  $F_2(A; B)^2$  measures differentiation in allele frequency between the two parental populations. Often, the designated parental populations for analysis are proxies for the true parental populations, in which case  $F_2(A; B)^2$  is a measure of the differentiation between the true parental populations that is shared by the proxy populations.

**Admixture at a single-time point.** Under a basic model of admixture, decay in ancestry-LD can be described by the parameters  $F$ ,  $t$  and  $G$  in the exponential model

$$\mathbb{E}[a(r)] = Fe^{-rt} + G \quad (11)$$

corresponding to a single pulse of admixture  $t$  generations ago. The term,  $G$ , represents admixture LD between unlinked markers, possibly due to substructure in the sampled individuals with respect to their ancestry proportions. The value  $F + G/2$  corresponds to  $2\alpha(1 - \alpha)F_2(A; B)^2$  (LOH *et al.* 2013), where  $\alpha$  is the admixture proportion, and therefore is a compound parameter reflecting both admixture proportion and differentiation between parental populations.

**Fitting to a geographic contact zone.** We take a set of admixed samples drawn from  $n$  populations, who fall at positions  $\ell_1, \dots, \ell_n$  along a linear geographic transect. The geographic location of the center of the zone along this transection is  $C$ , such that sample 1 is a distance  $\ell_1 - C$  from the zone. We specify a pair of proxy parental populations  $A$  and  $B$ , to represent the end points of the contact zone. Using ALDER we generate the statistic  $a_j(r_i)$  for the  $j^{th}$  population sample for each genetic distance bin ( $i$ ), giving us a set,  $\mathbf{a}$ , of weighted-LD decay curves (as defined in Eq 10). We use the minimum inter-SNP distance determined by ALDER based on LD in the parental populations.

To assess the uncertainty in  $\mathbf{a}$ , we estimate the variance in ALDER's statistics using the jackknife (which is an output of ALDER). For each of the  $c = 22$  iterations, one chromosome is removed before recalculating  $\mathbf{a}$  for the remaining 21 chromosomes. We use this to calculate the variance  $V_{i,j} = \text{Var}(a_j(r_i))^{\frac{c-1}{c}}$ . We then conduct a least squares fit of the ALDER output to our prediction given by Eq. (4) for values of  $\tau$ ,  $\sigma$ ,  $F$  (corresponding to  $F$  in Eq. 11 and  $C$ ). We fit all  $n$  populations simultaneously), calculating:

$$\mathcal{L}(\mathbf{a}; \tau, \sigma, C, F) = \sum_{i=1}^n \sum_j \frac{1}{V_{i,j}} (a_i(r_j) - D(r_j, \ell_i - C, \tau, \sigma)F)^2 \quad (12)$$

Our choice of  $\mathcal{L}(\cdot)$  would be the negative log-likelihood of our parameters if our  $a_j(r_i)$  were normally distributed, a reasonable approximation given the large number of pairs of markers contributing to each value of  $a_i(r_i)$ . We refer to  $\mathcal{L}(\cdot)$  as the log-likelihood, and because we are mainly interested in  $\tau$  and  $\sigma$  we generate profile surfaces of  $\tau \times \sigma$ . Specifically, we set a value for  $L$  based on a fit of Eq. 1 to ancestry proportion, generate a likelihood surface over a grid of  $\tau \times \sigma \times F$  and for

each combination of  $\tau$  and  $\sigma$  we defined the profile log-likelihood as the maximum log-likelihood across all of our corresponding  $F$  grid-points.

We note that, although Eq. 11 includes an affine term to account for LD that could be generated by an unspecified model of population substructure, our model does not. This is because a source of long-range LD is incorporated into our model via gene flow from neighboring populations with different admixture proportions.

## 3 Results

### 3.1 Simulation results and comparison to exponential model

Figure S1 shows the decay in LD at various points in time and space, and shows the exact correspondence between the analytic expression of Eq. 4 and the output of *simulations under the model*. To evaluate the consequences of fitting a single pulse model to data generated by our spatial model of continuous admixture, we fit the exponential decay of Eq. 11 to a set of simulated populations from a 50-generation old contact zone. The comparison, shown in Fig. S2, of best fit parameters indicates that the simple exponential tends to underestimate the age of the admixed populations by as much as a factor of 2, presumably because of the continuous introduction of migrants bearing long ancestral haplotypes. In other words, the poor fit of the single pulse model to these LD decay curves, especially close to the center of the contact zone, is due to the heterogeneous mixture of recombination times. Consistent with this interpretation, the effect diminishes in populations far from the center of the zone, as the difference in ancestry composition between neighboring populations decreases as the distance to the center increases.

To demonstrate our inference method as described above, we fit our model (Eq. 4) to the curves generated *under the process*. Because we simulated single chromosomes, we could not use the jackknife estimator of variance, and therefore modified Eq. 12 by removing the denominator. We removed populations with no detectable admixture from the fit, limiting our analysis to populations close to the center of the contact zone. The profile likelihoods of these surfaces are shown in Fig. 3). The inferred  $\tau$  and  $\sigma$  are (2, 0.17), (38, 0.12) and (93, 0.11) for zones simulated under  $\tau = 5$ ,  $\tau = 50$  and  $\tau = 100$  respectively, under  $\sigma = 0.1$ .

Compared to the true values we use to *simulate under the process* our inference method tends to slightly underestimate the age of the contact zone. We expect that

359 this is in part due to the discrete nature of the simulation. These estimates are closer  
 360 to the true simulated ages than those obtained by fitting an exponential (Eq. 11) to  
 361 each population, which return values of  $1.9 < \hat{\tau} < 4.2$  for  $\tau = 5$ ,  $20.4 < \hat{\tau} < 25.6$  for  
 362  $\tau = 50$  and  $40.0 < \hat{\tau} < 59.5$  for  $\tau = 100$  compared to our values of  $(\hat{\tau} = 2, \hat{\sigma} = 0.17)$   
 363 for  $(\tau = 5, \sigma = 0.1)$ ,  $(\hat{\tau} = 38, \hat{\sigma} = 0.12)$  for  $(\tau = 50, \sigma = 0.1)$  and  $(\hat{\tau} = 93, \hat{\sigma} = 0.11)$   
 364 for  $(\tau = 100, \sigma = 0.1)$ .

## 365 3.2 Application to human datasets

366 We applied our model to three independent sets of populations that potentially rep-  
 367 resent admixture in a spatial context: Populations along the Indonesian archipelago,  
 368 populations in Central Asia and populations in India (Table S1). Genetic distances  
 369 between SNPs were inferred using sex-averaged recombination rates from deCODE  
 370 (KONG *et al.* 2010).

### 371 3.2.1 Indonesian archipelago

372 Populations along the Indonesian archipelago show a longitudinal cline of admix-  
 373 ture between East Asian and Papuan autosomal ancestry (XU *et al.* 2012; LIPSON  
 374 *et al.* 2014; THE HUGO PAN-ASIAN SNP CONSORTIUM 2009). The decrease in  
 375 proportion of Asian ancestry with longitude has been interpreted as evidence of the  
 376 Austronesian expansion from the West through Indonesia. XU *et al.* (2012) fit sim-  
 377 ple admixture models independently to each of the populations to infer admixture  
 378 times of 120–200 generations, such that populations with higher Papuan ancestry  
 379 have more recent admixture times. A more recent analysis using ALDER estimated  
 380 single admixture dates for populations in the region in the range of 30–60 genera-  
 381 tions, suggesting that this in part is the result of subsequent waves of gene flow from  
 382 populations with varying levels of Asian ancestry (LIPSON *et al.* 2014).

383 We obtained the genotypes for seven population samples in Indonesia (shown in  
 384 Table S1 ) from THE HUGO PAN-ASIAN SNP CONSORTIUM (2009) and a Papuan  
 385 population from the HGDP dataset (LI *et al.* 2008). We first ran STRUCTURE  
 386 (PRITCHARD *et al.* 2000) with  $k = 2$  on these nine samples. The admixture propor-  
 387 tions obtained from STRUCTURE confirm the east to west cline (shown in Fig. 4).  
 388 We then ran a least squares fit for Eq. 1 on these admixture proportions, which  
 389 estimated the cline center at  $X = 124^{\circ}9'E$  and  $\sigma^2\tau = 50.9$ . Based on ancestry pro-  
 390 portions, we chose the Mentawai population and the Papua New Guinean population

(with  $\sim 55k$  shared SNPs) as proxy source populations to generate ALDER curves. Simultaneously fitting our model to the six admixed populations, we generated the profile-log likelihood surface shown in Fig. 4. The maximum likelihood parameters best fitting these curves were an approximate contact time of  $\sim 200$  generations or 5800 years ago (given a generation time of 29 years, FENNER 2005),  $\sigma = 0.63$  and  $F = 0.0045$ . The fit to LD decay curves under these estimates is shown in Fig. 4 and Supplementary Fig. S3.

We also explored the fit to LD decay curves of the single pulse model, fitting Eq. 11 by least squares (weighted by jack knife variance as in Eq. 12). Unsurprisingly, the fit of our model is not as good as a model in which all admixed populations are considered as having a single admixture time but allowed different values of  $F$  ( $\mathcal{L} = 100370.1$  compared to  $\mathcal{L} = 94147.7$ ) since independently fitting the y-intercept to each population allows for many more parameters while these intercepts in our model are constrained by geographic distances between the populations. The fits to each population are presented in Table S2 and are in good accordance with those found by LIPSON *et al.* (2014) using similar methods.. With this approach, the mean timing among the admixed populations is 60.8 generations (we ignore the Javanese population which has little admixture and an estimated admixture time of 665 generations which as this is far older than all the other populations.)

Additionally, we considered fitting all populations simultaneously for a single time under the exponential model (Eq. 11), allowing each population to choose their own  $F$  parameter to account for differences in admixture proportions. Under this model we obtain an estimated age of  $\tau \approx 63$  generations with minimum least squares of 98706. Again, this better fit is not surprising given that we are allowing each population to fit its own intercept.

Linguistic evidence suggests that the Austronesian expansion through Indonesia dates to  $\sim 2000$  BCE (GRAY *et al.* 2009). As noted by LIPSON *et al.* (2014) these single pulse dates (Table S2) are too recent to reflect this, consistent with our earlier observation (and that of other authors) that admixture times may be underestimated by a simple exponential model if admixture has been ongoing. Our estimate of timing based on fitting a geographic contact zone ( $\sim 200$  generations) is much older than dates estimated by single pulse models, but is also considerably older than the Austronesian expansion. Considering that it is constrained by having to fit all populations simultaneously, our model provides a good fit. One possible explanation for our overestimate of admixture time is the assumption of a continuous rate of diffusion after initial contact. Despite this, our model may be a more realistic depiction



of ongoing gene flow than a single pulse model and demonstrates that, in instances such as this where there is a gradient of admixture, incorporating a spatial model of admixture can provide additional insights into the history of these populations.

### 3.2.2 India

Population structure in India is complex and multilayered. While the precise history of human movement in this region is unclear, work by MOORJANI *et al.* (2013) and REICH *et al.* (2009) suggests that many modern Indian populations are descendants of an admixture event between differentiated Ancestral North Indian (ANI) and Ancestral South Indian (ASI) populations, with a cline in the extent of ANI ancestry across the subcontinent ((MOORJANI *et al.* 2013), Fig. 5). While it is difficult to identify modern proxies of the parental populations, the ANI population appears to be most closely related to Western Eurasian populations (such as Georgia) and the Onge population of the Andaman Islands seem to draw much of their ancestry from the ASI population. MOORJANI *et al.* (2013) broadly grouped their samples into Indo-European or Dravidian samples, and under this classification, found that the decay in ancestry-LD in their samples were consistent with two historical admixture events, one approximately 108 generations ago giving rise to the Dravidian populations, and a second wave of admixture from the north taking place 36 generations later that contributed to the ancestry of Indo-European populations.

We obtained the genomic data used in MOORJANI *et al.* (2013), REICH *et al.* (2009), METSPALU and ROMERO (2011) and LI *et al.* (2008), yielding approximately 83,000 shared SNPs, and focus on the populations represented in Table 1 of MOORJANI *et al.* (2013) (See our Table S1). Following MOORJANI *et al.* (2013), we ran the  $F_4$  ratio tool in the ADMIXTOOLS package (PATTERSON *et al.* 2012) on Georgian, Basque, Yoruba, Onge and the focal Indian population to estimate ANI ancestry proportions in these populations (Fig. 5). We fit a latitudinal cline to these ancestry proportions (Eq. 1) returning a cline center at  $24^{\circ}4'N$  and  $\sigma\sqrt{\tau} = 25.4$ . Because the gradient of ancestry could run along any geographic axis, we also tried to fit ancestry proportion clines to various transects using linear combinations of latitude and longitude. Since these did not produce substantially better fits than latitude alone, we chose to use latitude as our geographic axis (results not shown).

We then generated co-ancestry decay curves in ALDER for each of these samples, using weightings from Basque and Onge parental populations as proxies for the ANI

and ASI populations, see MOORJANI *et al.* (2013). We consider three possible contact zone scenarios: One in which all population samples form a contact zone and, based on the earlier studies, one that comprises only of the Indo-European and one that comprises only of the Dravidian populations. We initially attempted to fit the  $\tau$ ,  $\sigma$  and  $F$  parameters in Eq. 12 simultaneously, but faced some difficulty as there appears to be limited information about  $F$ . This results in wide range of values fitting the data equally well, but give rise to very different surfaces for  $\sigma$  and  $\tau$ . We attributed this to a deficit of information in the curves, leading to non-identifiability, due to relative low levels of differentiation and relatively rapid decay of ancestry-LD. The difficulty in estimating the intercept of admixture-LD curves had been noted before (LOH *et al.* 2013), and can reflect the fact that very close pairs of markers are discarded to remove the effects of LD in the ancestral populations. This results in the fitted curve being relatively unconstrained near  $r = 0$ . To remedy this, we estimated  $F$  using an approach similar to that taken by MOORJANI *et al.* (2013). Using MIXMAPPER (LIPSON *et al.* 2013), we estimated the value of  $F$  as  $F_2(ANI; ASI)^2$  using the Onge and Basque populations as present day proxies, and fit values of  $\sigma$  and  $\tau$  under the range of  $F_2$  values computed by MIXMAPPER ((0.015, 0.042)). We also use the value estimated above as the cline center for all three fits. We first fit our LD curves to all populations, under a model in which all Indo-European and Dravidian populations are the outcome of a single admixture contact zone. The best fit was approximately 220 generations since contact (Fig. 5). Fits to the subset of populations classified as Indo-European yielded a contact zone age of approximately 200 generations (Fig. S5). Finally, we fit the subset of Dravidian populations (Fig. S5), which found a best fit of 460 generations on a relatively flat surface. This is likely because there is very little information in the decay of LD in this subset given there are so few Dravidian populations, and that the LD curves are relatively flat.

Several aspects of the data indicate potential mis-estimation of dates. Some populations, presumably the oldest, have very little admixture-LD, which may prevent an accurate fit to the decay. Secondly, it is possible that the absence of ‘edge’ populations that are further away from the zone center makes it difficult to obtain a good fit, as we only have populations with intermediate levels of admixture where the decay of LD is not strongly related to the age of the zone. Substructure within populations, due to practices such as endogamy, may also influence ancestry-LD within a population and cause a deviation from expectations under a null model of random mating. We take these challenges, and the uncertainty in our results, as a reflection of the complicated demographic histories of these populations, and the fact that it is poorly described by the model which we are trying to fit. These challenges also

likely apply to other analyses of these data, meaning that caution is warranted in judging the age of this zone.

### 3.2.3 Central Asia

Populations in central Eurasia show varying levels of East Asian ancestry. In a global analysis, HELLENTHAL *et al.* (2014) identified a signal of admixture, using Mongolian and Iranians as proxy source samples, in Turkish, Uzbek, Hazara and Uygur samples. The proportion of Mongolian ancestry decreases with longitudinal distance from Mongolia, with the Turkish populations harboring the lowest proportion of Mongolian ancestry. The estimated admixture dates in these populations of 20-30 generations in the past found by HELLENTHAL *et al.* (2014) is consistent with the timing of the westward military movement of Mongolians during the 13th century.

We took the genomic data for the four admixed populations and the two proxy source populations from the dataset of Hellenthal et al (500k SNPs). A STRUCTURE analysis of these populations, with  $k = 2$ , is consistent with a gradient in Mongolian ancestry across Central Asia (Fig. 6). We used ALDER to generate weighted covariance curves, using the Mongolian and Iranian samples as the two proxy source populations. For the four admixed populations, the best fit (Eq. 18) under our simple contact zone model is approximately 49 generations, or 1421 years ago (29 years per generation), with  $\sigma = 3.7$  (see Fig. 6 for the profile likelihood surface). This admixture date predates the Mongolian invasion of Central Asia that took place approximately 800 years ago. However, it is known that human movement in Central Asia was complex, and preceded the Mongolian invasions by centuries, and it is possible that our estimated date is capturing a signal of these earlier migrations. This is supported by recent analyses of Central Asian populations by (YUNUSBAYEV *et al.* 2014).

ALDER identified a large extent of long-range LD in the Hazaran population, possibly due to population substructure within this sample with respect to Mongolian ancestry. Because this could potentially influence our inference, we refit the LD curves to the set of admixed populations excluding the Hazara. This produced a best fit of 37 generations.

One consideration in our applications is our assumption that the populations spread back into contact and then simply passively diffused into each other. This is obviously likely a poor description of the movement of Mongolian genotypes across

Asia during the 13th century invasions, which could result in a discrepancy between expected and predicted decay in ancestry-LD. We therefore proposed an alternate model that allows for an initial fast pulse of Mongolian migration into central Asia, followed by diffusion through local geographic dispersal (i.e. our Brownian motion). Explicitly, we construct a model which defines two additional parameters:  $X_1$ , a point in space to the east of which some proportion,  $\Psi$ , of the population is replaced by Mongolian genotypes  $\tau$  generations ago (see Appendix E for mathematical details). In specifying this model, we are trying to capture a scenario in which, at least initially, unadmixed Mongolian genotypes were making a rapid westward movement. However we acknowledge that this is at best a very crude approximation of a possible sequence of events.

While this alternate model provides a better fit to admixture proportions (Fig. 6 shows fit with  $\Psi = 0.55$  and  $X_1 = 62.7$ ), given the few populations, this good fit may reflect over-parameterization of the model. Furthermore, a search for the best fit to the LD decay curves returned parameters that were effectively identical to the initial basic model proposed ( $\Psi \approx 1$ , cline center around  $71^\circ E$ ), indicating that this is not a likely alternative model (profile likelihood curves for each fitted parameter are shown in supplemental figure S8). Given the early estimated admixture date, it is possible that admixture across Central Asia is not a product of a single event as our models, and those of others (HELLENTHAL *et al.* 2014), assume, but rather a result of complex human migrations throughout time. Despite the limitations imposed on inference of parameters by the small number of populations, broad patterns of ancestry-LD across space are nevertheless somewhat consistent with our proposed model of ancestry-LD decay across space along an admixture gradient.

## Discussion

The generation and subsequent decay of admixture-LD as an outcome of interbreeding between differentiated populations provides a population genetic signature that is a valuable tool for understanding the nature and timing of admixture. Existing methods for modeling decay in admixture-LD consider the expected rate of decay in one population at a time, and often assume a simple one-time ‘pulse’ of admixture without subsequent gene flow from neighboring admixed populations. Here, we have described a neutral model under which individuals diffuse across space. Based on this model, we derive an analytic expression for the expected decay in ancestry-LD as a function of time since contact and a population’s position in space. We consider this

an alternate model to one in which admixed populations are independently formed by a single-pulse event with potential subsequent gene flow from parental populations. In contrast to previous analyses of spatial admixture which treated populations as independent admixture events (e.g. XU *et al.* 2012), we consider data from all sampled populations simultaneously to build a model that incorporates all available information and accounts for the movement of individuals between populations. Compared to the expression for ancestry-LD derived here, a simple exponential model tends to underestimate the time since admixture, as it does not account for the introduction of long ancestral haplotypes from neighboring populations.

**Additional sources of covariance.** In developing tractable approximations to spatial admixture contact zone we have ignored genetic drift and the genealogical structure imposed by the pedigree.

Genetic drift is not problematic if population densities, and dispersal rates, are high enough that coalescence between geographical close lineages is unlikely over the time-scale  $\tau$  (as is likely the case in our human applications). Otherwise, a theoretical approach incorporating coalescence will be needed (see BARTON *et al.* 2013, for recent progress). However, in that case, background LD and admixture LD will be on comparable genomic scales, making the the job of separating the two much more challenging.

The other form of correlation structure that we have ignored is that imposed by the genealogy (WAKELEY *et al.* 2012; LIANG and NIELSEN 2014). When there are multiple crossovers during meiosis within the stretch of chromosome we are considering, the recombinants trace their ancestry to one of the two parents one generation back in time. When considering the chromosome tracts between recombination events, odd numbered recombinant segments come from one parent (say the mother), and even number segments from the other parent (the father). Therefore, the recombinants are not independent of each other as one generation back as all odd (or all even) recombinants are found in one parent. This additional covariance from the pedigree structure does not impact our pairwise model of ancestry-LD if  $r$  is strictly defined as a recombination fraction, as an odd number of recombinations between our pair of loci means that the two alleles are present in different parents in the proceeding generation and there after follow independent trajectories back in time. Our block length calculations ignore this form of covariance, as we assume that fragments follow independent spatial paths backward in time after recombination events. This assumption will only be problematic for long regions (where more than one recombination can happen per generation) and for short time intervals (i.e. small  $\tau$ ).

604 However, in such cases, ignoring genetic interference may present a greater source of  
605 error than the ignoring of this additional source of covariance.

### 606 3.3 Application of the model to human admixture data

607 To explore our model we used our approximate model to estimate contact times  
608 and dispersal variance from genomic data from admixed human populations. We  
609 present our fit to the output of weighted-LD from ALDER, but similar information  
610 about the extent of ancestry-LD can be obtained from alternative methods such as  
611 Chromopainter (LAWSON *et al.* 2012).

612 Our spatial model provided a good fit to admixed populations along the Indone-  
613 sian archipelago, consistent with a relatively straightforward history of admixture  
614 across space. Our estimated time of initial contact is somewhat consistent with the  
615 work of XU *et al.* (2012), and is older than reported by LIPSON *et al.* (2014). Our  
616 deeper admixture time estimate likely reflects the fact that inference under single-  
617 population admixture models will produce estimates of timing of initial admixture  
618 that is more recent than estimates under our contact zone model. Our estimate of  
619  $\approx 6000$  years ago is older than estimates obtained from linguistic analysis (GRAY  
620 *et al.* 2009). This could be in part due to the simplifying assumptions of our model,  
621 which requires dispersal to be constant in time and space. One could imagine, for  
622 example, that if there were pulses of human movement followed by a slowing down  
623 of dispersal this would impact our estimate.

624 Our spatial model provided a poor fit to the Indian and Central Asian popula-  
625 tions. This is likely due, in part, to deviations from a simple model of instantaneous  
626 removal of a barrier to contact and continuous diffusion thereafter. In India, a com-  
627 plex population structure, caste system, and potentially two waves of contact may  
628 have all contributed to difficulties in finding parameters that fit under our model. In  
629 particular, the need to separately estimate the y-intercept meant that there was rela-  
630 tively little information in the decay curves about the timing and mode of admixture.  
631 This is especially problematic for older admixture such as this (particularly in the  
632 Dravidians), as there is relatively little admixture-LD over larger scales and conse-  
633 quently much of our information relies on LD over short genetic distances ( $< 1\text{cM}$ ).  
634 Given this paucity of information, it is likely that many, and quite different, admix-  
635 ture models would fit these data nearly equally well. As such, our fit and estimate  
636 of timing, and indeed the estimates under alternate models, should be interpreted  
637 with caution.



638 The limited number of populations in Central Asia places a limit on the confidence  
 639 for the fit to the data under any dispersal model. Furthermore, it is known that  
 640 human movement in the region spans many centuries and is unlikely to be simple.  
 641 While earlier attempts to date admixture in these populations estimate admixture  
 642 times of  $\approx 30$  generations, corresponding to the Mongolian invasions (HELLENTHAL  
 643 *et al.* 2014), our estimated time is much older, at  $\approx 50$  generations. It is unlikely  
 644 that our demographic model is a good approximation to historical human movement  
 645 in the area, and this is likely to have impacted our inference. However, it is possible  
 646 that our estimate of earlier admixture is in part reflecting older human movements  
 647 in the region, and this is in part supported by the findings of (YUNUSBAYEV *et al.*  
 648 2014).

### 649 3.4 Extensions of the simple neutral model and other appli- 650 cations

651 The assumption of Brownian movement, and the ignoring of drift and pedigree struc-  
 652 ture have enabled the derivation of a relatively simple expression to describe ancestry-  
 653 LD. The examples of human admixture zones provides above indicate, however, that  
 654 alternative models may be need to describe patterns of LD, given different demo-  
 655 graphic scenarios. We therefore consider the basic Brownian model to be a neutral  
 656 framework and acknowledge that, while it may be a good approximation for some  
 657 scenarios of admixture and secondary contact, in many cases individuals may not  
 658 diffuse continuously in space and time. Because of the simplicity of our model, mod-  
 659 ifications can be made with relative ease to describe different geographic scenarios.  
 660 For example, we were able to apply a model in which the movement of Mongolian  
 661 genotypes began as a pulse of migrants, followed by diffusion. In a similar vein,  
 662 one could modify movement to contain a Brownian drift parameter to account for  
 663 directional migration, although this would require some consideration as to how the  
 664 dispersal kernel of an admixed individual is determined. Discrete deme models could  
 665 also be used (as we develop in Appendix B) to model complex histories of popula-  
 666 tions in geographic and temporal heterogeneity. However, in practice there is not  
 667 enough information in admixture decay curves to infer detailed population histories  
 668 with many parameters.

669 We have demonstrated that inference of admixture parameters can be greatly  
 670 influenced by the choice of demographic model. We believe that this highlights the  
 671 need for more admixture models to be developed to test with population genomic



data, and for careful consideration of which model is appropriate for a given biological scenario. The model presented here makes some progress towards addressing the movement of admixed individuals, and presents a potential framework for future development of dispersal models. As a final point, we note that all (to our knowledge) admixture models to date, including ours, assume that populations undergo differentiation in relative isolation prior to secondary contact. Under this assumption, there is a strong appeal to fit pulse models (such as a wave of secondary contact) to human admixture data, with a goal to estimating the timing of a pulse, and relating it to particular historical events. It seems that perhaps a more appropriate null model in these scenarios would be one in which gene flow has been ongoing between populations, but at a rate slow enough to allow some differentiation to occur. Testing for patterns of LD under this isolation-by-distance model would be a first step towards understanding the demographic history of spatially distributed populations, and the development of such a null model seems an important step in creating future tools for population genomic inference.

In addition to admixture contact zones, LD has been used to characterize hybrid zones (WANG *et al.* 2011), and we see our framework as a potential null model for spatial models of secondary contact, whereby incipient species come back into contact. Although tension zones can maintain distinct species, reproductive isolation is often weak enough to allow diverged populations to exchange alleles. In such scenarios, patterns of diversity that depart from expected ancestry-LD could be used to detect potential targets of selection relevant to speciation or local adaptation. The expected population genomic signatures of such loci will depend on the nature of selection – for example, patterns of LD around a gene under differential selection may differ from patterns of selection against certain hybrid genotypes. It should be noted, however, that good estimates of decay in ancestry-LD require reliable genetic maps, as overestimates of genetic distance may give the appearance of a slower rate of decay by inflating LD and this may be a limiting factor in many systems.

The LD induced by the admixing of two differentiated populations is a powerful population genetic tool which, combined with genome-wide data, has enabled the use of decay in ancestry-LD to inform the timing of admixture events. Building on models that use this decay to infer admixture dates under scenarios with discretized migration events, we have developed a novel framework that accounts for continuous movements of haplotypes through time and space. We believe that this can serve as a good null model for understanding patterns of diversity in contact zones. Furthermore, we see potential for this model to be further developed and tailored to fit a

range of demographic scenarios, including those that incorporate selection.

## Acknowledgements

We thank P. Moorjani, G. Hellenthal and M. Metspalu for access to data, and Simon Aeschbacher, Alison Etheridge, Jeremy Berg, Gideon Bradburd and Ivan Juric for helpful conversations and comments. This work was supported by the NSF GRFP under Grant No. 1148897 and by grants from the National Science Foundation under Grant No. 1262645 to P. Ralph and G. Coop and the National Institute of General Medical Sciences of the National Institutes of Health under award numbers NIH RO1GM83098 and RO1GM107374 awarded to G. Coop.

## Appendix

### A Covariance in Ancestry

By integration by parts, equation (3) becomes:

$$e^{-r\tau} \Phi\left(\frac{\ell}{\sigma\sqrt{\tau}}\right) + \left[-e^{-rt} \int_{\ell}^{\infty} \int_{\ell}^{\infty} f_t(y, z) dy dz\right]_{t=0}^{t=\tau} + \int_0^{\tau} e^{-rt} \int_{\ell}^{\infty} \int_{\ell}^{\infty} \frac{\partial f_t}{\partial t} dy dz dt, \quad (\text{A1})$$

where  $f_t(y, z)$  is the bivariate normal density for jointly distributed  $(Y, Z)$  with correlation  $t$ . The second term of (A1) is:

$$\Phi\left(\frac{\ell}{\sigma\sqrt{\tau}}\right)^2 - e^{-r\tau} \Phi\left(\frac{\ell}{\sigma\sqrt{\tau}}\right) \quad (\text{A2})$$

For the third term of (A1), we can utilize the useful identity that for a bivariate normal with variances 1 and correlation  $t$  (PEARSON 1901):

$$\frac{\partial}{\partial t} f_t(y, z) = \frac{\partial^2}{\partial y \partial z} f_t(y, z). \quad (\text{A3})$$

The last term of (A1) becomes:

$$\int_0^{\tau} e^{-rt} f_t(\ell, \ell) dt \quad (\text{A4})$$

Combining Eq. 2 and A1, A3, A4 therefore leaves us with:

$$\text{Cov}(\mathcal{A}_1, \mathcal{A}_2) = \int_0^\tau e^{-rt} \frac{1}{2\pi\tau\sigma^2 \sqrt{1 - (\frac{t}{\tau})^2}} \exp\left(-\frac{\ell^2(1 - \frac{t}{\tau})}{\tau\sigma^2(1 - (\frac{t}{\tau})^2)}\right) dt \quad (\text{A5})$$

## B Island model

In a discretized time and space model, with  $n$  islands and per-generation migration rates defined by the  $n \times n$  matrix  $M$ , the expected frequency of ancestry  $B$  alleles in population  $X$  is

$$\mathbb{E}[\mathbf{1}_B(\mathcal{A})] = \sum_{j \in S} M_{X,j}^\tau, \quad (\text{A6})$$

where  $X$  is the deme from which an individual is sampled,  $\tau$  is the number generations since admixture began,  $S$  is the set of demes that are defined as being ancestry  $B$  at the time of contact, and  $M_{X,j}^\tau$  is element  $i, j$  of the  $\tau^{\text{th}}$  matrix power of  $M$ . The covariance is derived by summing over possible recombination times and the location of the allele at the time of recombination ( $N$  is the set of all locations.):

$$\text{Cov}(\mathcal{A}_1, \mathcal{A}_2) = (1-r)^\tau \sum_{i \in S} M_{X,i}^\tau + \sum_{t=0}^{\tau-1} (1-r)^t r \left( \sum_{j \in N} M_{X,j}^t \left( \sum_{a \in S} M_{j,a}^{\tau-t} \right)^2 \right) - \left( \sum_{i \in S} M_{X,i}^\tau \right)^2 \quad (\text{A7})$$

Note that  $r$  is the probability of any odd number of recombinations occurring, i.e. is the probability that a Poisson random variable with mean  $d$  is odd.

## C Unlabeled rooted topologies and their probabilities:

To obtain the set  $\mathcal{T}^k$  and the associated  $\Pr(\mathcal{T}_i^k)$ , we use the following result from CAVALLI-SFORZA and EDWARDS (1967). Given  $k$  tips, the number of unlabeled topologies,  $a_k$  is given by the recursion:

$$a_k = \begin{cases} a_1 a_{k-1} + \dots + a_{(k-1)/2} a_{(k+1)/2} & k \text{ odd} \\ a_1 a_{k-1} + \dots + \frac{1}{2} a_{k/2} (a_{k/2} + 1) & k \text{ even} \end{cases}$$

742 with initial conditions  $a_1 = 1, a_2 = 1$

743 Intuitively, for the set of  $a_k$  topologies  $\mathcal{T}^k = \{\mathcal{T}_1^k \dots \mathcal{T}_{a_k}^k\}$ , a topology  $\mathcal{T}_i^k$  is generated  
 744 by joining  $\mathcal{T}_m^j \in \mathcal{T}^j$  with  $\mathcal{T}_n^{k-j} \in \mathcal{T}^{k-j}$  at the root ( $m$  and  $n$  are arbitrary). Because  
 745 each subtree is independent, the probability of a topology given  $k$  recombinations  
 746 can be calculated using a similar intuition. The probability,  $p(\mathcal{T}_i^k)$ , of topology  $\mathcal{T}_i^k$  is  
 747 the product of the probabilities of each subtree, relative to every combination that  
 748 yields a tree of size  $k$ .

$$p(\mathcal{T}_i^k) = 2 \binom{k-1}{j} \frac{p(\mathcal{T}_m^j) j! p(\mathcal{T}_n^{k-j}) (k-j)!}{k!} \quad (\text{A8})$$

749 Where  $\mathcal{T}_i^k$  is the topology made by joining topologies  $\mathcal{T}_m^j$  and  $\mathcal{T}_n^{k-j}$  at the root.

750

The covariances for each topology representing  $k$  recombination events are dependent on the order statistics for  $k$  uniformly iid sampled recombination times. The  $\mathbf{t}'$  over which we integrate are conditional on these ordered recombination times. Specifically, if  $t'_j$  is the recombination time corresponding to node  $j$  on the tree, then  $t'_j$  becomes a lower bound for all subsequent recombination times associated with nodes that are descended from node  $j$ . Correspondingly, the factor  $v(t'_j)$  is a function of the recombination times

$$v(t_j) = (M_j + 1) \frac{(1 - t'_j)^{M_j}}{(1 - t'_i)^{M_j+1}},$$

751 where node  $i$  is the parental node to  $j$  with corresponding time  $t'_j$ , and  $M_j$  is the  
 752 number of nodes descendent from node  $j$ . Here we have assumed recombination times  
 753 are continuously distributed, and that double-recombination events do not occur (i.e.  
 754 all nodes are unique with respect to timing.)

## 755 **D Obtaining block length distributions by a Branching Brownian Motion** 756

757 An alternative approach the multiple-recombination scenario can be taken without  
 758 conditioning on the number of recombination events. The process of recombination  
 759 and dispersal described above is analogous to a Branching Brownian Motion (BBM),  
 760 where recombination is represented by a splitting event. In standard BBM, lineages

761 have a constant rate of splitting, but here the total length of the chromosome is  
 762 constant, and so we have conservation of the total rate of splitting  $d$ . The rate of  
 763 splitting on a lineage decreases with each recombination event, as both products of  
 764 recombination are shorter (and therefore have a smaller probability of recombina-  
 765 tion).

766 Below, we derive an integro-differential equation satisfied by  $U$ , similarly to the  
 767 classic analysis of branching Brownian motion by MCKEAN (1975). Starting in the  
 768 present, we follow a single lineage backward in continuous time. The movement of  
 769 this lineage is Brownian with variance  $\sigma^2$ . We model recombination events between  
 770 the two loci as a Poisson process with rate  $d$ . At the first recombination event, we  
 771 generate a uniform random variable,  $r^1 \in [0, d]$  to represent the genomic position of  
 772 the recombination event. We then split the sequence into left and right fragments –  
 773  $[0, r^1)$  and  $[r^1, d]$ , respectively. Following this, the two lineages move independently  
 774 backwards in time with respective recombination (splitting) rates of  $r^1$  and  $d - r^1$ .  
 775 This process is iterated over the time period  $\tau$ .

776 We consider moving back a very short time interval  $\Delta t$  from the present, and  
 777 take the expectation over the random events that could have occurred in that time  
 778 interval. (In other words, we are writing down the infinitesimal generator of this  
 779 Markov process.)

780 With probability  $1 - d\Delta t + O(\Delta t^2)$  there is no recombination during the interval  
 781  $\Delta t$  and conditioning on this, we have only to take the expectation over the small  
 782 random change  $\Delta x$  in spatial location during this time.

$$U_d(\tau, \ell | \text{no rec.}) = \mathbb{E}_{\Delta x}[U_d(\tau - \Delta t, \ell + \Delta x)], \quad (\text{A9})$$

783 where  $\mathbb{E}_{\Delta x}$  is the expectation over all changes in position  $X$ .

784 A recombination event occurs in the interval  $\Delta t$  with probability  $d\Delta t$ . Condi-  
 785 tioning on recombination occurring at time  $t_{\text{rec}}$  at position  $\ell + \Delta x'$ , producing two  
 786 recombinants of length  $d_1$  and  $d - r_1$ :

$$U_d(\tau, \ell | \text{rec.}) = \int_0^d \int_0^{\Delta t} \mathbb{E}_{\Delta x'}[U_{r_1}(\tau - t_{\text{rec}}, \ell + \Delta x') U_{d-r_1}(\tau - t_{\text{rec}}, \ell + \Delta x')] dr_1 dt_{\text{rec}}, \quad (\text{A10})$$

787 where  $U_{r_1}$  is the probability that all subsequent recombinants along the chromosomal  
 788 fragment of length  $r^1$  are of ancestry type  $B$ .

789 As  $\Delta t \rightarrow 0$ , the Taylor expansion of (A9) and (A10) about  $X$  gives the expression:

$$\frac{\partial U_d}{\partial t}(\tau, x) = \frac{\sigma^2}{2} \frac{\partial^2 U_d}{\partial x^2}(\tau, x) - dU_d(\tau, x) + \int_0^d U_{r^1}(\tau, x) U_{d-r^1}(\tau, x) dr^1, \quad (\text{A11})$$

with boundary conditions  $U_d(0, x) = 1$  for  $x > 0$  and  $U_d(0, x) = 0$  for  $x \leq 0$ . This differential equation is solved by  $U_d(t, x)$ , defined in Eq. 5, and is the probability that at time  $\tau$  in the past, the leftmost branch of this branching process initiated at position  $x_0$  is at a position  $x > 0$ . This differential equation is related to that presented by BAIRD *et al.* (2003) to describe the survival of genomic blocks within a panmictic population (but the latter does not have a spatial diffusion term). The equation is similar to the Fisher-KPP equation, with differences arising from the non-constant splitting rate. The first term of Eq. A11 reflects the spatial diffusion of lineages, the second term reflects the loss of blocks of length  $d$  to recombination. The final term reflects fact that the two recombinant lineages (of size  $d - r_1$  and  $r_1$ ) independently have to be of type  $B$ , and the dependence of this probability on the physical location of the recombination event, which is integrated over.

## E Invasion pulse

Suppose an invasive population displaces a subset  $\Psi$  of a resident population at  $\tau$  generations in the past such that the frequency of ancestry  $B$  at time  $\tau$  is 0 for  $-\infty < x < X_1$  and  $\Psi$  for  $x > X_1$ . The ancestry LD at position  $X$  in this situation is:

$$(1 - \Psi)\Psi e^{-r\tau} \Phi\left(\frac{(\ell - X_1)}{\sigma\sqrt{\tau}}\right) + \Psi^2 \int_0^1 e^{-rt\tau} \frac{1}{2\pi\sigma^2\sqrt{1-t^2}} \exp\left(-\frac{(\ell - X_1)^2}{\tau\sigma^2(1+t)}\right) dt \quad (\text{A12})$$

As after  $\tau$  generations the probability of ancestry  $B$  is the probability of both of our lineages being in  $(X_1, \infty)$  multiplied by  $\Psi$

## References

- BAIRD, S., N. BARTON, and A.M. ETHERIDGE, 2003 The distribution of surviving blocks of an ancestral genome. *Theoretical Population Biology* **64**: 451–471.
- BARTON, N. H., F. DEPAULIS, and A. M. ETHERIDGE, 2002 Neutral evolution in spatially continuous populations. *Theoretical population biology* **61**: 31–48.
- BARTON, N. H., A. M. ETHERIDGE, J. KELLEHER, and A. VÉBER, 2013 Genetic hitchhiking in spatially extended populations. *Theoretical population biology* .

- 816 CAVALLI-SFORZA, L., and W. BODMER, 1971 *The Genetics of Human Populations*.  
817 W.H. Freeman, San Francisco, 1 edition.
- 818 CAVALLI-SFORZA, L., and A. EDWARDS, 1967 Phylogenetic analysis Models and  
819 estimation procedures. *American journal of human genetics* **19**: 233–257.
- 820 CHAKRABORTY, R., and K. WEISS, 1988 Admixture as a tool for finding linked genes  
821 and detecting that difference from allelic association between loci. *Proceedings of*  
822 *the National ...* **85**: 9119–9123.
- 823 ETHERIDGE, A. M., 2000 *An introduction to superprocesses*. American Mathemat-  
824 ical Society, Providence, RI.
- 825 FALUSH, D., M. STEPHENS, and J. K. PRITCHARD, 2003 Inference of population  
826 structure using multilocus genotype data: linked loci and correlated allele frequen-  
827 cies. *Genetics* **164**: 1567–87.
- 828 FENNER, J. N., 2005 Cross-cultural estimation of the human generation interval for  
829 use in genetics-based population divergence studies. *American journal of physical*  
830 *anthropology* **128**: 415–23.
- 831 GRAVEL, S., 2012 Population genetics models of local ancestry. *Genetics* **191**: 607–  
832 19.
- 833 GRAY, M. M., J. M. GRANKA, C. D. BUSTAMANTE, N. B. SUTTER, A. R. BOYKO,  
834 L. ZHU, E. A. OSTRANDER, and R. K. WAYNE, 2009 Linkage disequilibrium and  
835 demographic history of wild and domestic canids. *Genetics* **181**: 1493–505.
- 836 HARRIS, K., and R. NIELSEN, 2013 Inferring demographic history from a spectrum  
837 of shared haplotype lengths. *PLoS genetics* **9**: e1003521.
- 838 HELLENTHAL, G., G. B. J. BUSBY, G. BAND, J. F. WILSON, C. CAPELLI,  
839 D. FALUSH, and S. MYERS, 2014 A genetic atlas of human admixture history.  
840 *Science* **343**: 747–51.
- 841 KONG, A., G. THORLEIFSSON, D. F. GUDBJARTSSON, G. MASSON, A. SIG-  
842 URDSSON, A. JONASDOTTIR, G. B. WALTERS, A. JONASDOTTIR, A. GYLFA-  
843 SON, K. T. KRISTINSSON, S. A. GUDJONSSON, M. L. FRIGGE, A. HELGASON,  
844 U. THORSTEINSDOTTIR, and K. STEFANSSON, 2010 Fine-scale recombination rate  
845 differences between sexes, populations and individuals. *Nature* **467**: 1099–103.



- 846 LAWSON, D. J., G. HELLENTHAL, S. MYERS, and D. FALUSH, 2012 Inference of  
847 population structure using dense haplotype data. *PLoS genetics* **8**: e1002453.
- 848 LI, J., D. ABSHER, H. TANG, A. SOUTHWICK, A. CASTO, S. RAMACHANDRAN,  
849 H. CANN, G. BARSCH, M. W. FELDMAN, L. CAVALLI-SFORZA, and R. M. MY-  
850 ERS, 2008 Worldwide Human Relationships Inferred from Genome-Wide Patterns  
851 of Variation. *Science* **25**: 1100–1105.
- 852 LIANG, M., and R. NIELSEN, 2014 The Lengths of Admixture Tracts. *Genetics* **197**:  
853 953–967.
- 854 LIPSON, M., P.-R. LOH, A. LEVIN, D. REICH, N. PATTERSON, and B. BERGER,  
855 2013 Efficient moment-based inference of admixture parameters and sources of  
856 gene flow. *Molecular biology and evolution* **30**: 1788–802.
- 857 LIPSON, M., P.-R. LOH, N. PATTERSON, P. MOORJANI, Y.-C. KO, M. STONEK-  
858 ING, B. BERGER, and D. REICH, 2014 Reconstructing Austronesian population  
859 history in Island Southeast Asia. *bioRxiv* **May 27, 20**.
- 860 LOH, P., M. LIPSON, N. PATTERSON, P. MOORJANI, J. K. PICKRELL, D. REICH,  
861 and B. BERGER, 2013 Inferring admixture histories of human populations using  
862 linkage disequilibrium. *Genetics* **193**: 1233–1254.
- 863 MCKEAN, H., 1975 Application of Brownian Motion to the Equation of Kolmogorov-  
864 Petrovskii-Piskunov. *Communications on Pure and Applied Mathematics* **28**: 323–  
865 331.
- 866 METSPALU, M., and I. ROMERO, 2011 Shared and unique components of human  
867 population structure and genome-wide signals of positive selection in South Asia.  
868 *The American Journal of ...*: 731–744.
- 869 MOORJANI, P., K. THANGARAJ, and N. PATTERSON, 2013 Genetic evidence for  
870 recent population mixture in India. *The American Journal of Human Genetics* :  
871 422–438.
- 872 PATTERSON, N., P. MOORJANI, Y. LUO, S. MALICK, N. ROHLAND, Y. ZHAN,  
873 T. GENSCHORECK, T. WEBSTER, and D. REICH, 2012 Ancient admixture in  
874 human history. *Genetics* **192**: 1065–1093.
- 875 PEARSON, K., 1901 Mathematical Contributions to the Theory of Evolution. {VII}.  
876 {On} the Correlation of Characters not Quantitatively Measurable. *Philosophical*

- 877 Transactions of the Royal Society of London. Series A, Containing Papers of a  
878 Mathematical or Physical Character **195**: pp. 1–47+405.
- 879 POOL, J. E., and R. NIELSEN, 2009 Inference of historical changes in migration rate  
880 from the lengths of migrant tracts. *Genetics* **181**: 711–9.
- 881 PRICE, A. L., A. TANDON, N. PATTERSON, K. C. BARNES, N. RAFAELS,  
882 I. RUCZINSKI, T. H. BEATY, R. MATHIAS, D. REICH, and S. MYERS, 2009  
883 Sensitive detection of chromosomal segments of distinct ancestry in admixed pop-  
884 ulations. *PLoS genetics* **5**: e1000519.
- 885 PRITCHARD, J. K., M. STEPHENS, and P. DONNELLY, 2000 Inference of population  
886 structure using multilocus genotype data. *Genetics* **155**: 945–59.
- 887 REICH, D., K. THANGARAJ, N. PATTERSON, A. L. PRICE, and L. SINGH, 2009  
888 Reconstructing Indian population history. *Nature* **461**: 489–94.
- 889 SHIGA, T., 1980 An interacting system in population genetics. *Journal of Mathe-*  
890 *matics of Kyoto University* **2**: 213–242.
- 891 THE HUGO PAN-ASIAN SNP CONSORTIUM, 2009 Mapping human genetic diver-  
892 sity in Asia. *Science (New York, N.Y.)* **326**: 1541–5.
- 893 WAKELEY, J., L. KING, B. S. LOW, and S. RAMACHANDRAN, 2012 Gene genealo-  
894 gies within a fixed pedigree, and the robustness of Kingman’s coalescent. *Genetics*  
895 **190**: 1433–45.
- 896 WANG, L., K. LUZYNSKI, J. E. POOL, V. JANOUŠEK, P. DUFKOVÁ, M. M.  
897 VYSKOČILOVÁ, K. C. TEETER, M. W. NACHMAN, P. MUNCLINGER, M. MA-  
898 CHOLÁN, J. PIÁLEK, and P. K. TUCKER, 2011 Measures of linkage disequilibrium  
899 among neighbouring SNPs indicate asymmetries across the house mouse hybrid  
900 zone. *Molecular ecology* **20**: 2985–3000.
- 901 WRIGHT, S., 1943 Isolation by Distance. *Genetics* **28**: 114–38.
- 902 XU, S., I. PUGACH, M. STONEKING, M. KAYSER, L. JIN, and H. P.-A. S.  
903 CONSORTIUM, 2012 Genetic dating indicates that the Asian–Papuan admixture  
904 through Eastern Indonesia corresponds to the Austronesian expansion. *Proceed-*  
905 *ings of the National Academy of Sciences* **109**: 4574–4579.

906 YUNUSBAYEV, B., M. METSPALU, E. METSPALU, A. VALEEV, S. LITVINOV,  
907 R. VALIEV, V. AKHMETOVA, E. BALANOVSKA, O. BALANOVSKY, S. TUR-  
908 DIKULOVA, D. DALIMOVA, P. NYMADAWA, A. BAHMANIMEHR, H. SAHAKYAN,  
909 K. TAMBETS, S. FEDOROVA, N. BARASHKOV, I. KHIDIATOVA, R. KHUSAIN-  
910 OVA, L. DAMBA, M. DERENKO, B. MALYARCHUK, L. OSIPOVA, M. VOEVODA,  
911 L. YEPISKOPOSYAN, T. KIVISILD, and R. VILLEMS, 2014 Title: The Genetic  
912 Legacy of the Expansion of Turkic-Speaking Nomads Across Eurasia. BioArXiv .

Figure 1: **A:** We follow backward in time the Brownian motion paths of two initially linked lineages, represented here by two black circles located on a grey chromosome. The paths of the two lineages are identical until the first recombination event between them at time  $t$ , after which they follow independent Brownian paths. The red cross indicates the position, relative to the center of the zone, where the chromosome was sampled in the present day. The black rectangle represents a barrier to dispersal that was removed at time  $\tau$ . In this example, both alleles are of ancestry  $B$ , since they are on the same side of the barrier to dispersal at time  $\tau$ . **B:** Brownian motion paths of a tract of chromosome. As in Fig. 1A, the path along chromosomal fragments are identical until recombination breaks the fragments up. Here, the position of each chromosomal fragment at time  $\tau$  is shown. For the entire portion of chromosome to be of uniform ancestry, all products of recombination must be on the same side of the barrier to dispersal at time  $\tau$ . Here, the green and yellow fragments constitute an unbroken tract of  $B$  ancestry.

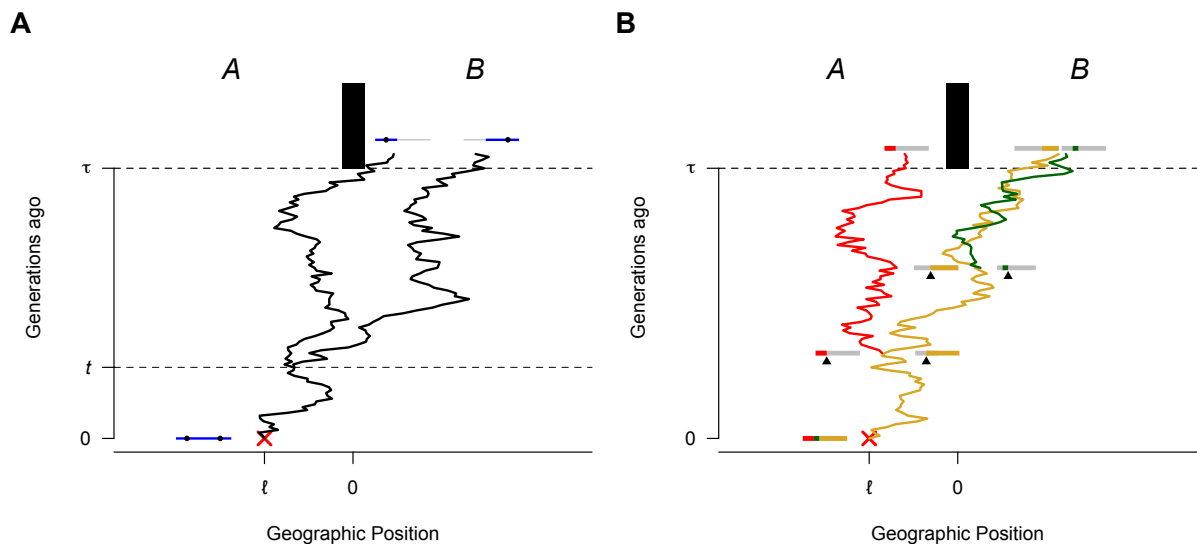

Figure 2: Distribution of tract lengths, expressed as the frequency of tracts that are at least a given length (i.e. 1-cumulative distribution of tract lengths). The following shows the distribution for populations  $L$  units away from the center of a contact zone. The solid lines represent the output of a simulated contact zone with no drift. For the 5-generation contact zone the four dotted lines per geographic position represent the predicted distribution under approximations conditioning on at most 3,4, 5 or 6 recombination events. For the 10-generation contact zone, the three dotted lines represent approximations conditioning on at most 3,4 or 5 recombination events.

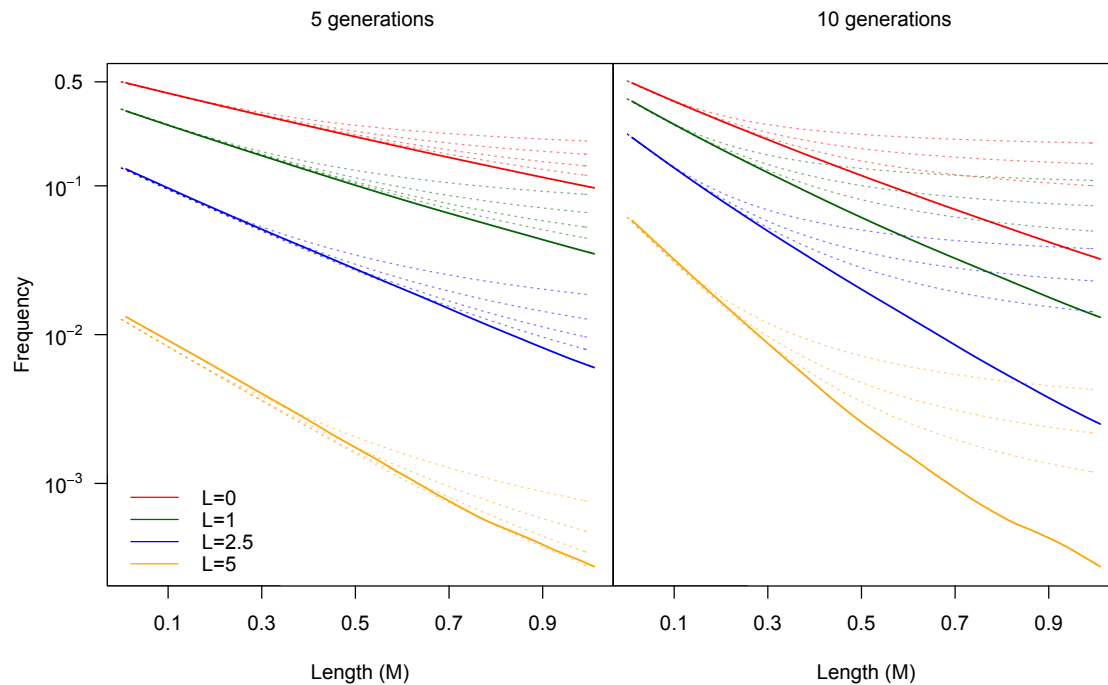



Figure 4: **A:** Longitudinal cline in Asian ancestry. Black dotted line shows best fit to Eq. 1. **B:** Sampling locations of Indonesian populations. Blue dot denotes the representative Asian ancestral population and red dot the representative Papuan population. Vertical yellow line shows location of the inferred cline center. **C:** Profile likelihood surface for  $\tau$  and  $\sigma$  under Eq. 12 for all admixed Indonesian populations. The blue line represents the curve  $50.9 = \sigma^2\tau$ , corresponding to the value of this compound parameter that is obtained by fitting to admixture proportions alone as shown in Fig. 4A. **D:** Weighted-LD curves for two populations of different distances away from the center of the cline. Grey points represents estimates of LD generated by ALDER, and black curves are expected LD under the estimated parameters.

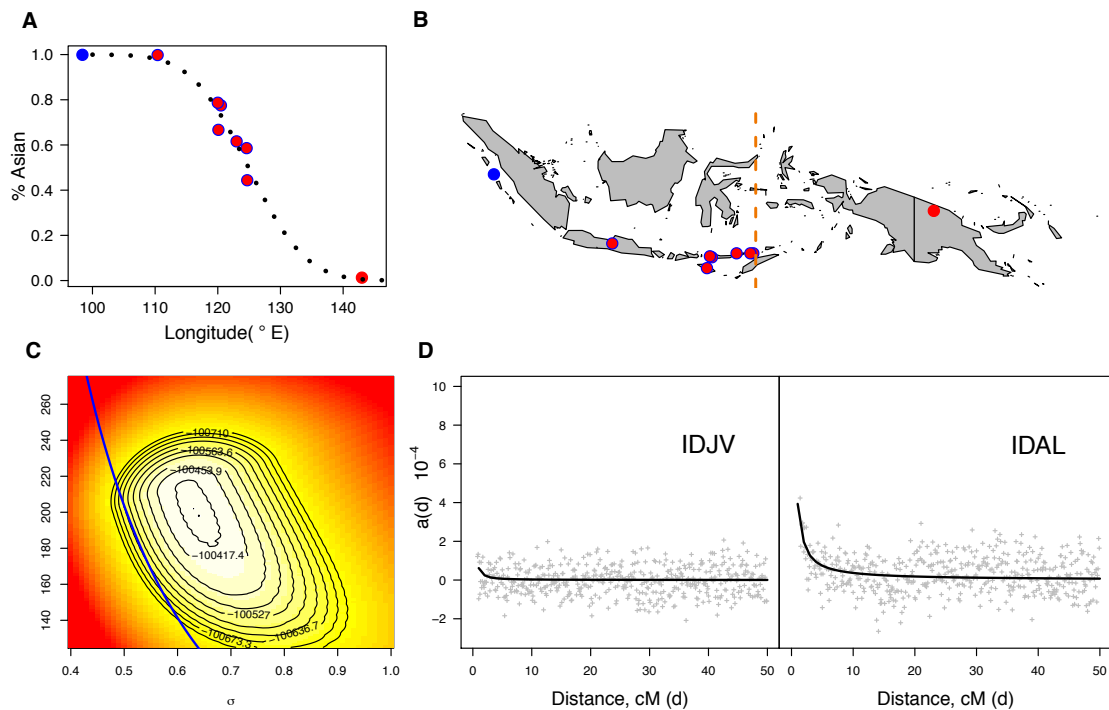



Figure 5: **A:** Latitudinal cline in ANI ancestry. **B:** Locations of Indian populations used in the analysis. Yellow line indicates location of inferred cline center. **C:** Profile likelihood surface for  $\tau$  and  $\sigma$  under E1. 12. Blue line represents the relationship  $\sigma\sqrt{\tau} = 25.4$ , as obtained from the cline in ancestry proportion. Asterisk denotes values providing best fit. **D:** Weighted LD curves as estimated by ALDER, for a northwest (Kashmiri Pandit), southern (Vysya) and northeast (Kanjars) population. Grey points are estimates generated by ALDER, and black curves are expected LD under the estimated parameters.

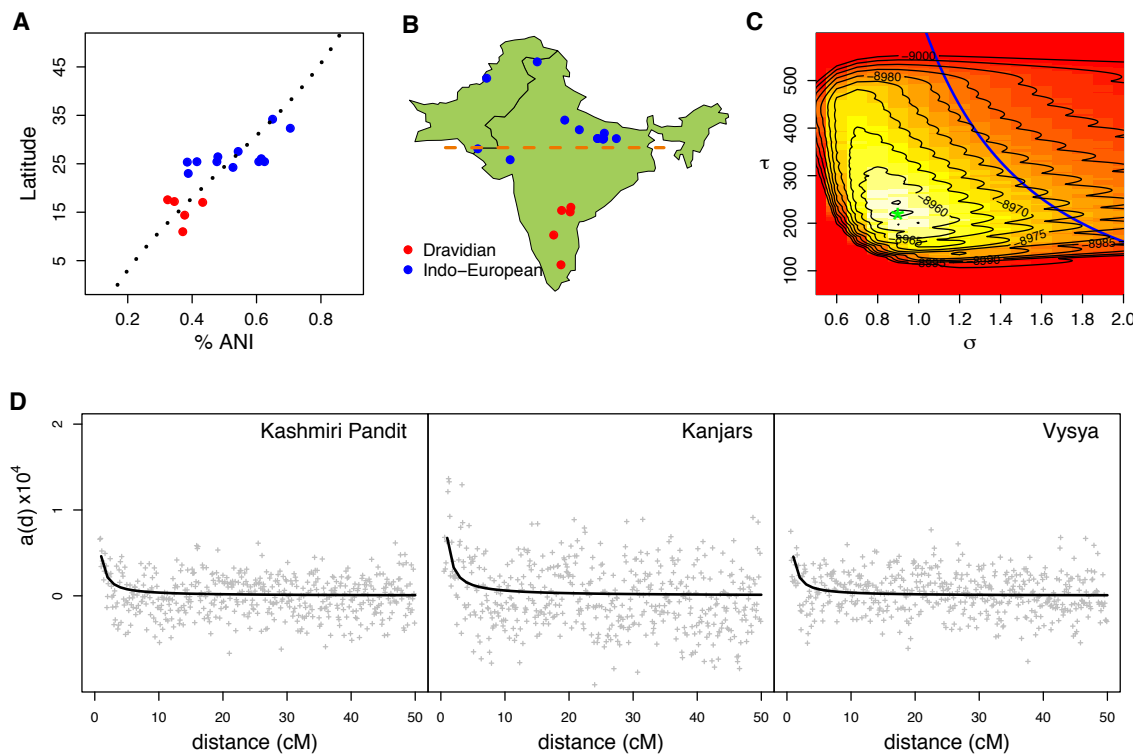

Figure 6: **A:** Geographic location of Mongol-Iranian admixed populations used in the analysis. **B:** Ancestry proportions, with best fit under basic Brownian model (dashed, thick line), and under pulse model (unbroken thin line) **C:** Best fit under our model to LD-decay curves (Hazara not shown), and profile likelihood surface to the set of all four populations (top right). Blue line indicates  $4.2 = \sigma^2\tau$ , the compound parameter estimated by fitting to admixture proportions.

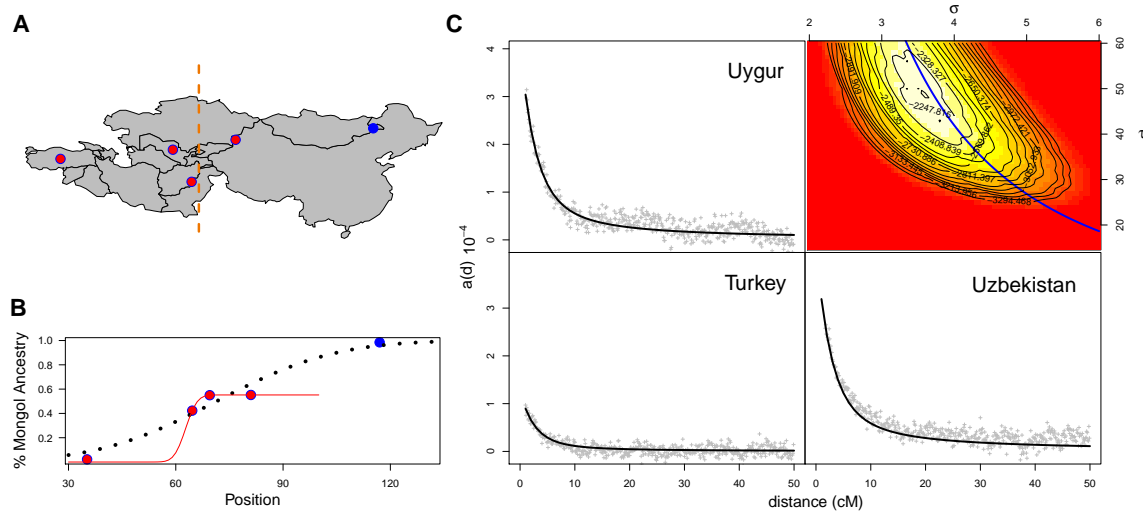

Source: http://biorxiv.org/content/10.1101/016337v1.full.pdf
